# Supplementary material for: Cognitive, Neurological, and Behavioral Features in Adults With KCNJ11 Neonatal Diabetes
Source: Oxford University Press journal article supplement (doi:10.2337/dc18-1060), 2018-10-30
Supplement: dc181060supplementarydata.pdf [file dc181060supplementarydata.pdf]

SUPPLEMENTARY DATA

**Supplementary Figure S1.** ACE-R in *KCNJ11* individuals (blue), n=7 and *INS* individuals (orange), n=4. Scores are presented as percentages of maximum possible score for each subsection. A total score of  $\leq 82$  is suggests clinically relevant cognitive impairment.

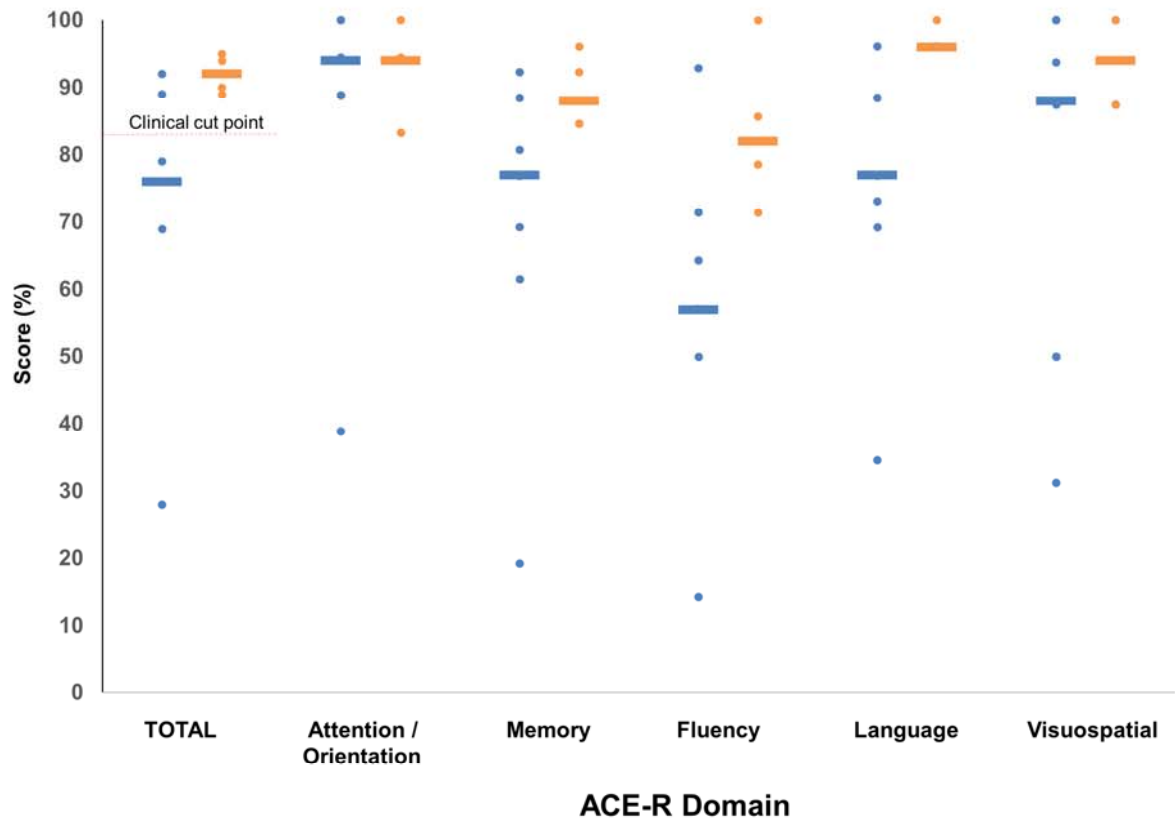

## SUPPLEMENTARY DATA

### Supplementary Table S1. Clinical characteristics of participants with *KCNJ11* mutations excluded from analysis

NK = not known, D=delayed, MS = Mainstream school, SS = Special school, LS = learning support, E = employed, UE = unemployed, MR = medically retired

| Case ID (mutation)       | Sex | Age (years) | Age at diabetes diagnosis (weeks) | Age at genetic diagnosis (years) | Age at SU transfer (years) | Treatment (total daily dose) | Development (type of delay) | Seizures (cause, if known)     | Learning difficulties / support / education | Employment status (job)         | Psychiatric history                                                                     | Neurological features                                                                                                                          |
|--------------------------|-----|-------------|-----------------------------------|----------------------------------|----------------------------|------------------------------|-----------------------------|--------------------------------|---------------------------------------------|---------------------------------|-----------------------------------------------------------------------------------------|------------------------------------------------------------------------------------------------------------------------------------------------|
| <i>KCNJ11</i> 9 (V59M)   | F   | 44          | 8                                 | 35                               | 36                         | Glyburide (60mg)             | D (global)                  | Yes – hypoglycaemia on insulin | Unable to speak / read / write, SS          | UE                              | Nil                                                                                     | Spastic tetraparesis, able to follow 1-step commands only, unable to speak but able to vocalise noises.                                        |
| <i>KCNJ11</i> 10 (L164P) | M   | 44          | 16                                | 39                               | 40                         | Glyburide (dose NK)          | D (motor)                   | No                             | LS (through school), MS                     | MR (previously E - Post Office) | Bipolar disorder – two hospital admissions. On ziprasidone, fluoxetine, metoclopramide. | Cogging pursuit eye movement, hypomimia, reduced arm swing, cogwheel rigidity of arms, mild rigidity of legs. Difficulty with motor sequences. |

### Supplementary Table S2. Individual scores on subtests of the Wechsler Memory Scale 4<sup>th</sup> edition (WMS-IV), Wechsler Abbreviated Scale of Intelligence (WASI), Wechsler Adult Intelligence Scale 4<sup>th</sup> edition (WAIS-IV), and Colour Trails Test (CTT) I and II. ND = Not done.

| Patient         | Mutation | WMS-IV (Z-score)                     |                                    |                                 |                               | WASI (Z-score) |                  |                |              | WAIS-IV (Z-score) |              | Colour Trails Test |       |
|-----------------|----------|--------------------------------------|------------------------------------|---------------------------------|-------------------------------|----------------|------------------|----------------|--------------|-------------------|--------------|--------------------|-------|
|                 |          | Verbal paired associates (immediate) | Verbal paired associates (delayed) | Visual reproduction (immediate) | Visual reproduction (delayed) | Vocabulary     | Matrix reasoning | IQ (raw score) | IQ (Z-score) | Digit span        | Cancellation | CTT 1              | CTT 2 |
| <i>KCNJ11</i> 1 | G53S     | -1.67                                | -2                                 | -3                              | -1.67                         | -2.3           | -1.8             | 65             | -2.33        | -2.33             | -1           | -2.5               | -1.7  |
| <i>KCNJ11</i> 2 | R201H    | 0                                    | 0.33                               | 0                               | 0.33                          | 0.5            | -2.3             | 101            | 0.067        | 0.33              | 0            | -0.9               | 0.8   |
| <i>KCNJ11</i> 3 | R201H    | 0.33                                 | 1                                  | 0.67                            | 1.33                          | 1.6            | -3.2             | 99             | -0.067       | -1.33             | 0            | -0.1               | 0.6   |
| <i>KCNJ11</i> 4 | R201C    | 0                                    | 0.33                               | -1.33                           | -1.33                         | -0.9           | -0.9             | 86             | -0.933       | -2                | -1           | -1.3               | 0.1   |
| <i>KCNJ11</i> 5 | R201C    | -1.67                                | -1.67                              | -1.33                           | -0.33                         | 0.1            | -4               | 76             | -1.6         | -1.67             | -1           | -2.1               | -3    |
| <i>KCNJ11</i> 6 | V252G    | -2                                   | -2.67                              | -3                              | -3                            | -3.2           | -4.8             | 55             | -3           | -3                | -3           | ND                 | ND    |
| <i>KCNJ11</i> 7 | V59M     | 0                                    | 0.66                               | -3                              | -2.33                         | -1.1           | -4.4             | 65             | -2.33        | -3                | -2           | -3                 | -1.9  |
| <i>KCNJ11</i> 8 | V59M     | ND                                   | ND                                 | ND                              | ND                            | ND             | ND               | ND             | ND           | ND                | ND           | ND                 | ND    |
| <i>INS</i> 1    | C43F     | 0.67                                 | 1.33                               | 0.33                            | 1                             | 2.1            | 0.6              | 124            | 1.6          | 0.33              | 2.67         | 0.13               | 0.6   |
| <i>INS</i> 2    | F48C     | 1.67                                 | 1.33                               | 0.67                            | 0                             | 0.9            | 0.6              | 113            | 0.867        | 0                 | 3            | 0.6                | 0.8   |
| <i>INS</i> 3    | G75C     | -1                                   | -0.67                              | 1                               | 0                             | 0.2            | 0.8              | 109            | 0.6          | -1                | 3            | 1.2                | 1.2   |
| <i>INS</i> 4    | H29D     | 0                                    | 0                                  | -1.33                           | -0.67                         | -0.4           | -0.7             | 90             | -0.67        | 0                 | 0.67         | -1.1               | -1    |

# SUPPLEMENTARY DATA

**Supplementary Table S3.** Individual scores on Autism Spectrum Quotient (AQ), Hospital Anxiety and Depression Scale (HADS), Controlled Oral Word Association Test (COWAT), and subtests of the Visual Object and Space Perception battery (VOSP) and Addenbrooke's Cognitive Examination-Revised (ACE-R). ND = Not done.

| Patient         | Mutation | AQ raw score | HADS raw score |        | COWAT Z-score | VOSP Score (Pass/Fail) |                 |              |               | ACE-R raw score |                               |              |               |                |                    |
|-----------------|----------|--------------|----------------|--------|---------------|------------------------|-----------------|--------------|---------------|-----------------|-------------------------------|--------------|---------------|----------------|--------------------|
|                 |          |              | HADS A         | HADS D |               | Incomplete Letters     | Object Decision | Dot Counting | Cube Analysis | Total (/100)    | Attention / orientation (/18) | Memory (/26) | Fluency (/14) | Language (/26) | Visuospatial (/16) |
| <i>KCNJ11 1</i> | G53S     | 33           | 9              | 1      | -2.21         | F                      | P               | P            | F             | 69              | 16                            | 20           | 7             | 18             | 8                  |
| <i>KCNJ11 2</i> | R201H    | 12           | 6              | 6      | -1.31         | P                      | P               | P            | P             | 89              | 17                            | 23           | 10            | 23             | 16                 |
| <i>KCNJ11 3</i> | R201H    | 17           | 9              | 2      | 0.79          | P                      | P               | P            | P             | 92              | 18                            | 21           | 13            | 25             | 15                 |
| <i>KCNJ11 4</i> | R201C    | 32           | 9              | 7      | -1.91         | P                      | F               | P            | P             | 76              | 18                            | 16           | 8             | 20             | 14                 |
| <i>KCNJ11 5</i> | R201C    | 24           | 10             | 5      | -1.72         | P                      | F               | P            | F             | 79              | 16                            | 18           | 9             | 20             | 16                 |
| <i>KCNJ11 6</i> | V252G    | ND           | 14             | 8      | ND            | P                      | F               | F            | F             | 28              | 7                             | 5            | 2             | 9              | 5                  |
| <i>KCNJ11 7</i> | V59M     | 25           | 9              | 7      | -1.92         | P                      | P               | F            | F             | 76              | 17                            | 24           | 8             | 19             | 8                  |
| <i>KCNJ11 8</i> | V59M     | ND           | ND             | ND     | ND            | ND                     | ND              | ND           | ND            | ND              | ND                            | ND           | ND            | ND             | ND                 |
| <i>INS 1</i>    | C43F     | 5            | 1              | 0      | -0.77         | P                      | P               | P            | P             | 95              | 18                            | 24           | 11            | 26             | 16                 |
| <i>INS 2</i>    | F48C     | 15           | 12             | 4      | -0.86         | P                      | P               | P            | P             | 89              | 15                            | 25           | 10            | 25             | 14                 |
| <i>INS 3</i>    | G75C     | 26           | 6              | 1      | -0.42         | P                      | P               | P            | P             | 94              | 17                            | 22           | 14            | 25             | 16                 |
| <i>INS 4</i>    | H29D     | 30           | 17             | 7      | -0.79         | P                      | F               | P            | P             | 90              | 17                            | 22           | 12            | 25             | 14                 |
